# Supplementary material for: The effect of silicate ions on proliferation, osteogenic differentiation and cell signalling pathways (WNT and SHH) of bone marrow stromal cells
Source: Royal Society of Chemistry journal article supplement (doi:10.1039/c2bm00108j), 2012-12-12
Supplement: c2bm00108j.pdf [file c2bm00108j.pdf]

Supplementary Figure

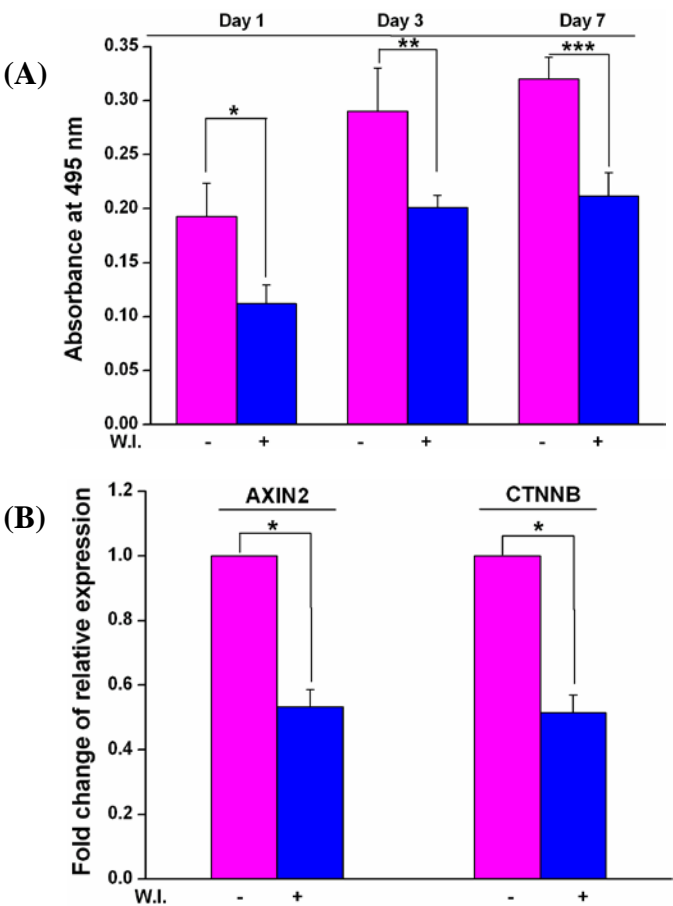

Supplementary Figure 1. The effect of cardamonin (WNT inhibitor, W.I.) on the cell proliferation (A) and WNT-related gene expression (B) of BMSCs at the concentration of 10 $\mu$ M. At day 1, 3 and 7, the cell proliferation of BMSCs was decreased by W.I. without Si ions (A). The fold change of *AXIN2* and *CTNNB* expression was reduced after 3 days cultured with WNT inhibitor (B) (fold change<1) compared with the group without the WNT inhibitor.
